# Supplementary material
Source: PubMed Central journal article supplement (PMC7669653)

**A**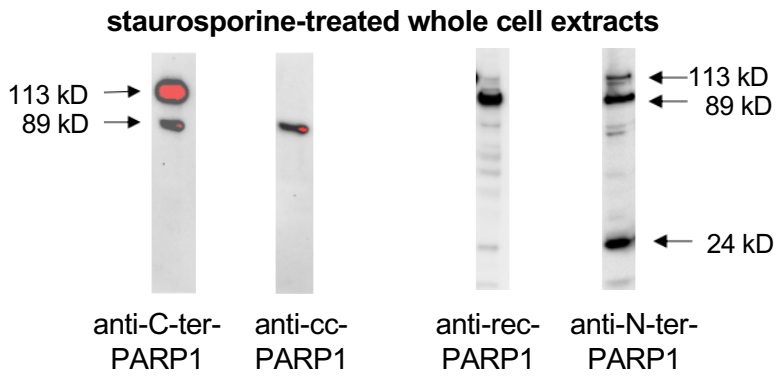**B**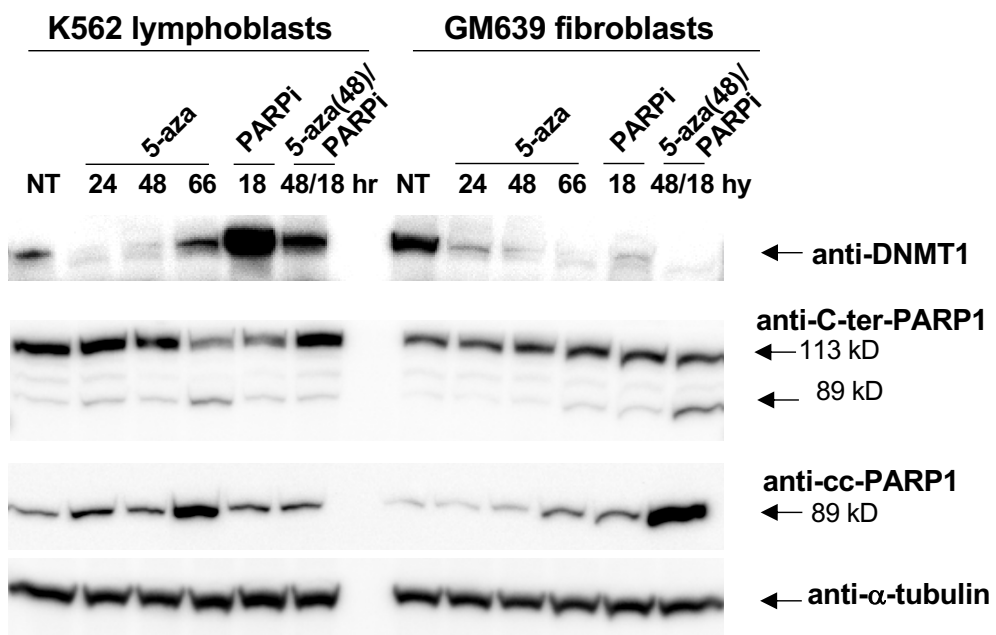**Fig. S1**

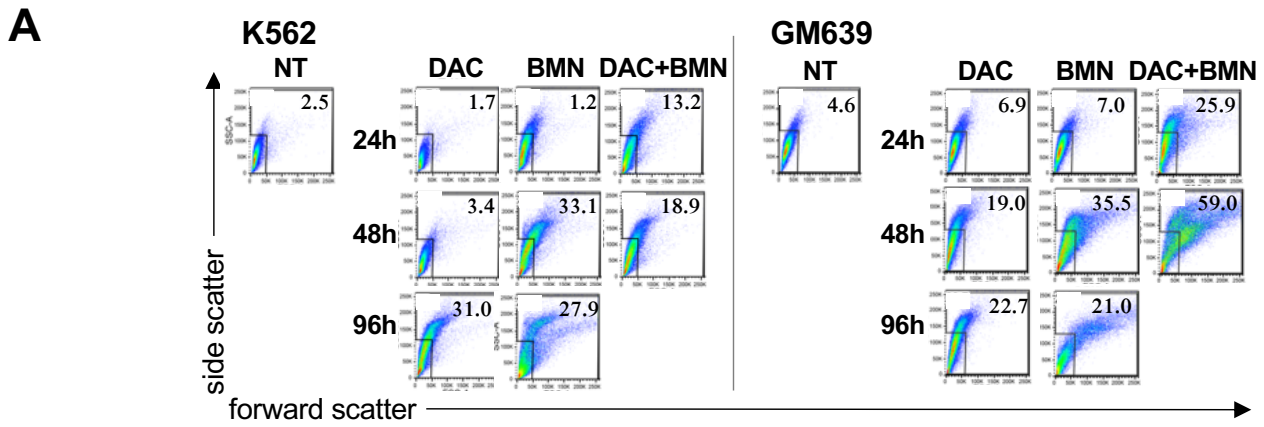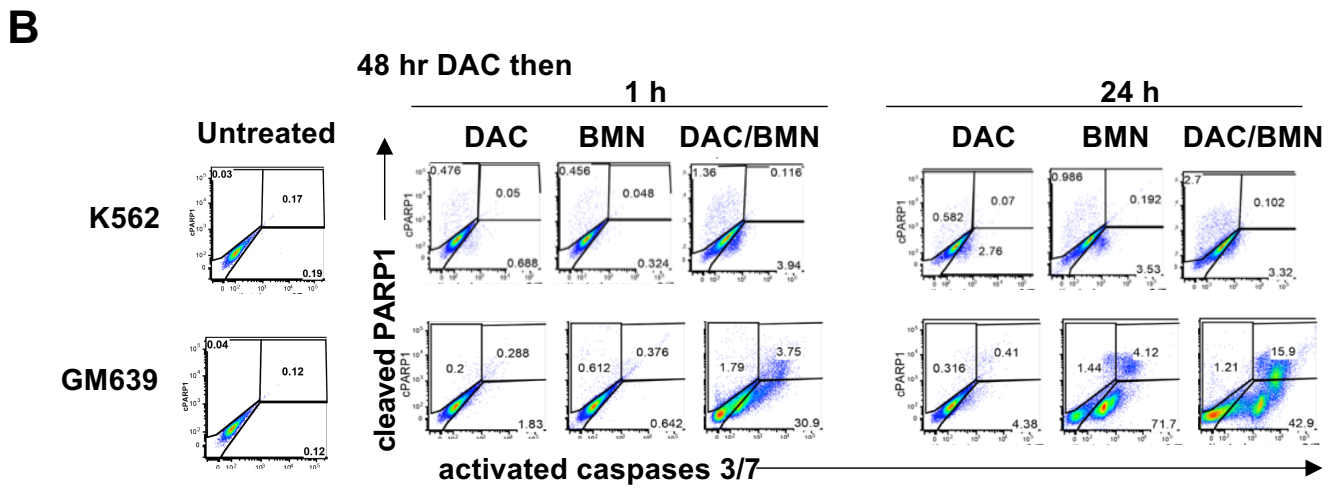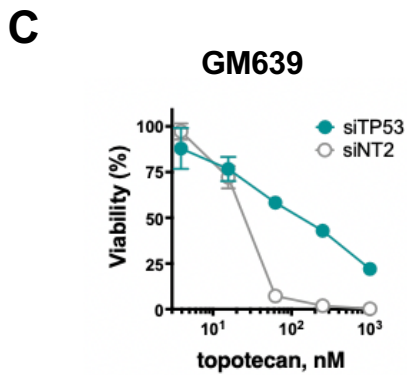

Fig. S2

Supplement: NIHMS1636024-supplement-1.pdf [file NIHMS1636024-supplement-1.pdf]
